# Supplementary material
Source: publisher figshare collection journal article supplement (https://acs.figshare.com/ndownloader/files/4506337)

## **Supporting Information**

### **Efficient Synthesis of 1,4-Diaryl-5-methyltriazole, A Potential mGluR1 Antagonist, and the Risk Assessment Study of Arylazides**

*Takayuki Tsuritani,\*<sup>a</sup> Hiroo Mizuno,\*<sup>a</sup> Nobuaki Nonoyama,<sup>a†</sup> Satoshi Kii,<sup>a†</sup> Atsushi Akao,<sup>a†</sup> Kimihiko Sato,<sup>a†</sup> Nobuyoshi Yasuda<sup>b</sup> and Toshiaki Mase<sup>a</sup>*

<sup>a</sup> Process Research, PreClinical Department, Banyu Pharmaceutical Co. Ltd., 3 Okubo, Tsukuba, Ibaraki 300-2611, Japan

<sup>b</sup> Process Research, Merck Research Laboratories, Merck & Co. Inc., Rahway, New Jersey 07065, U.S.A.

<sup>†</sup> Current address has changed.

#### **Table of contents**

<sup>1</sup>H and <sup>13</sup>C NMR spectra of **1**

S 2

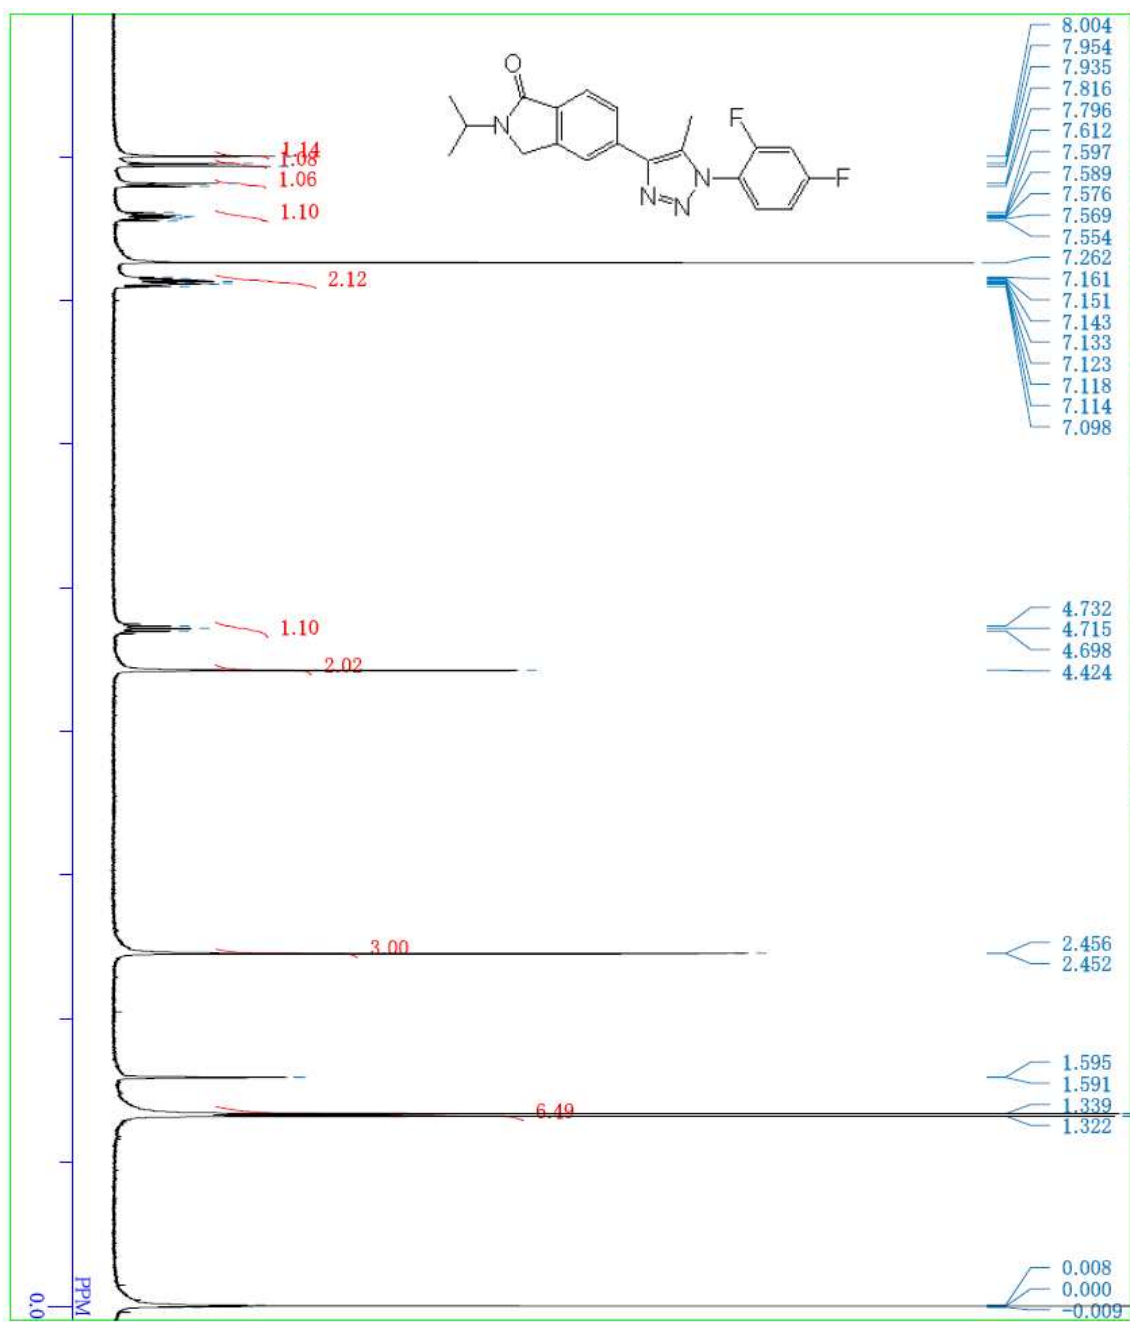

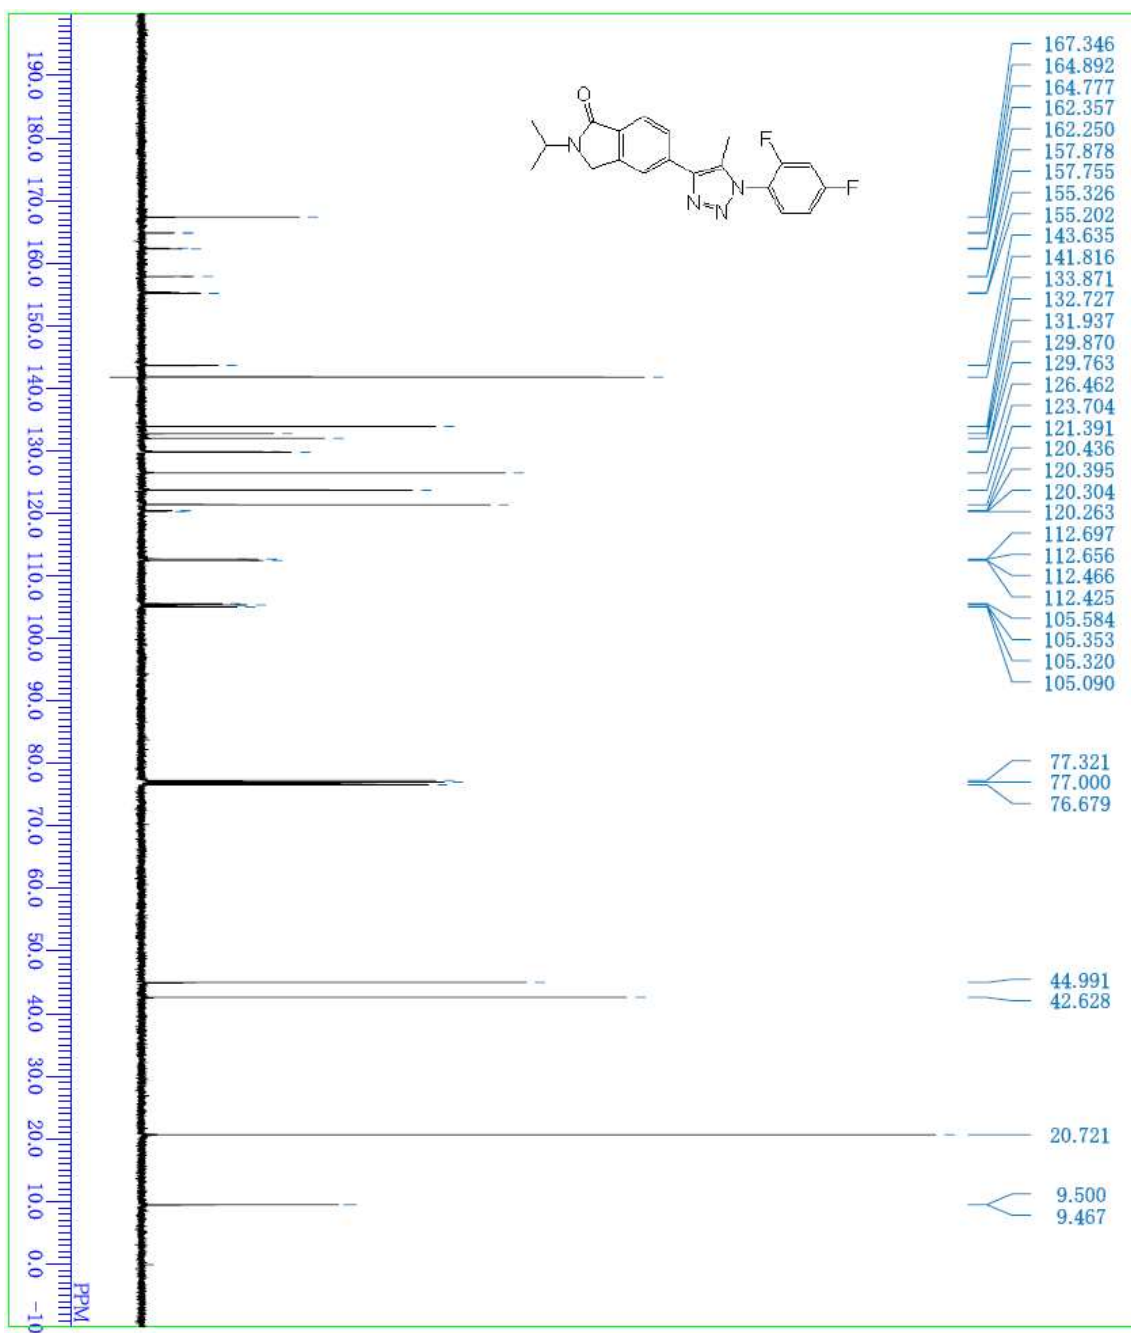

Supplement: Supplementary file 1 [file 4506337]
